# Supplementary material for: Best Practice Recommendations for Dysphagia Management in Stroke Patients: A Consensus from a Portuguese Expert Panel
Source: PubMed Central journal article supplement — Port J Public Health. 2022 Jan 25;39(3):145–62. doi: 10.1159/000520505 (PMC11320086; doi:10.1159/000520505), 2022-01-25
Supplement: pjp-0039-0145-s02.pdf [file pjp-0039-0145-s02.pdf]

### Worksheet: PICO and Research Strategy

|                                                |                                                                                                                                                                                                                                                                                               |
|------------------------------------------------|-----------------------------------------------------------------------------------------------------------------------------------------------------------------------------------------------------------------------------------------------------------------------------------------------|
| Clinical question                              | When should the ability to swallow be screened and assessed in stroke patients?                                                                                                                                                                                                               |
| Population                                     | Stroke patients                                                                                                                                                                                                                                                                               |
| Intervention                                   | Screening                                                                                                                                                                                                                                                                                     |
| Comparison                                     | control                                                                                                                                                                                                                                                                                       |
| Outcome                                        | Dysphagia                                                                                                                                                                                                                                                                                     |
| List of most important topics and search terms | Stroke; cerebrovascular accident; apoplexy; dysphagia; swallowing disorders; deglutition disorders; screening; assessment.                                                                                                                                                                    |
| First search                                   | Seven guidelines: Boulanger et al., 2018; Burgos et al., 2018; Hebert et al., 2016; Stroke Foundation, 2019.; National Collaborating Center for Chronic Conditions, 2019; Powers et al., 2019; Winstein et al., 2016.<br>Two systematic reviews: Eltringham et al., 2019; Smith et al., 2018. |
| Second search for updated evidence             | One observational study: Han et al., 2018                                                                                                                                                                                                                                                     |

|                                                |                                                                                                                                                                                                                                                                                                       |
|------------------------------------------------|-------------------------------------------------------------------------------------------------------------------------------------------------------------------------------------------------------------------------------------------------------------------------------------------------------|
| Clinical question                              | What tools are available to screen dysphagia in acute stroke patients?                                                                                                                                                                                                                                |
| Population                                     | Stroke patients                                                                                                                                                                                                                                                                                       |
| Intervention                                   | Screening                                                                                                                                                                                                                                                                                             |
| Comparison                                     | Videofluoroscopy swallowing study or fiberoptic endoscopic evaluation of swallowing                                                                                                                                                                                                                   |
| Outcome                                        | Dysphagia                                                                                                                                                                                                                                                                                             |
| List of most important topics and search terms | Stroke; cerebrovascular accident; apoplexy; dysphagia; swallowing disorders; screening; screening tool; validity; reliability; gold standard.                                                                                                                                                         |
| First search                                   | Seven guidelines: Boulanger et al., 2018; Burgos et al., 2018; Hebert et al., 2016; Stroke Foundation, 2019.; National Collaborating Center for Chronic Conditions, 2019; Powers et al., 2019; Winstein et al., 2016.<br><br>Two systematic reviews: Oliveira et al., 2019; Poorjavad & Jalaie, 2014. |

|                                                |                                                                                                                                                                                                                                                                                                                                              |
|------------------------------------------------|----------------------------------------------------------------------------------------------------------------------------------------------------------------------------------------------------------------------------------------------------------------------------------------------------------------------------------------------|
| Clinical question                              | Does the introduction of oral hygiene protocols, compared to standard oral hygiene care, decrease mortality and morbidity or improve health outcomes in stroke patients with dysphagia?                                                                                                                                                      |
| Population                                     | Stroke patients with dysphagia                                                                                                                                                                                                                                                                                                               |
| Intervention                                   | Oral hygiene protocols                                                                                                                                                                                                                                                                                                                       |
| Comparison                                     | Standard care                                                                                                                                                                                                                                                                                                                                |
| Outcome                                        | Complications (adverse events), morbidity, mortality, length of stay, oral hygiene, oral health and quality of life                                                                                                                                                                                                                          |
| List of most important topics and search terms | Oral hygiene; oral care; oral health; stroke; cerebrovascular accident; apoplexy; dysphagia; swallowing disorders; pneumonia; length of stay; morbidity; death; infectious complications; complications; poor outcome; oral hygiene; oral health; quality of life.                                                                           |
| First search                                   | Seven guidelines: Baijens et al., 2016; Boulanger et al., 2018; Hebert et al., 2016; Menella & Heering, 2018; Stroke Foundation, 2019; Powers et al., 2019; Winstein et al., 2016.<br><br>One systematic review: Brady et al., 2006.<br><br>Non-systematic reviews: Ajwani et al., 2017; Kwok et al., 2015; Lyons et al., 2018; Kelly, 2010. |
| Second search for updated evidence             | 13 studies retrieved (next table).                                                                                                                                                                                                                                                                                                           |

| Author                | Study design | Participants/Intervention                                                                                                                                                                                                                                                                                                                                                                                                                                              | Outcome measurement                                                                       | Results                                                                                                                                                                                                                                                                                                                                                     |
|-----------------------|--------------|------------------------------------------------------------------------------------------------------------------------------------------------------------------------------------------------------------------------------------------------------------------------------------------------------------------------------------------------------------------------------------------------------------------------------------------------------------------------|-------------------------------------------------------------------------------------------|-------------------------------------------------------------------------------------------------------------------------------------------------------------------------------------------------------------------------------------------------------------------------------------------------------------------------------------------------------------|
| Ab Malik et al., 2018 | Experimental | 86 participants in rehabilitation, diagnosed with moderate to severe stroke (Barthel Index < 70);<br>Intervention group: instructions for oral hygiene with electric toothbrush and 1% chlorhexidine gel, for six months;<br>Control group: instructions for oral hygiene with manual toothbrush and commercial toothpaste for six months.                                                                                                                             | Opportunistic pathogens in the oral cavity identified through culture                     | Statistically significant reduction of yeast in the oral cavity in the intervention group at six months ( $p < 0.05$ ) and <i>Staphylococcus aureus</i> , aerobic and gram-negative bacilli throughout the study ( $p < 0.01$ ), but not significant between groups. <i>Candida albicans</i> and <i>Klebsiella pneumoniae</i> were the prominent pathogens. |
| Chen et al., 2019     | Experimental | 66 participants in rehabilitation, dysphagic, after first stroke;<br>Intervention group: standard oral hygiene care (brushing twice a day, morning and evening) plus oral hygiene care for 10 to 15 minutes, 30 minutes before swallowing training, three times a week, consisting of brushing according to the Bass technique, finishing with coating the teeth with a fluoride paste, for three weeks;<br>Control group: standard oral hygiene care for three weeks. | Oral health assessed with the Oral Health Assessment Tool                                 | Significant improvement in oral health in the intervention group $\chi^2 = 29.02$ , $p < 0.001$ .                                                                                                                                                                                                                                                           |
| Chipps et al., 2014   | Experimental | 51 participants in rehabilitation, dysphagic, diagnosed with stroke for less than 30 days;<br>Intervention group: brushing the teeth and tongue with a brush and toothpaste, flossing and rinsing with a solution based on phenolic compounds, twice a day, for ten days;                                                                                                                                                                                              | Oral health assessed with Revised-THROAT oral assessment tool and nasal and oropharyngeal | All participants improved their oral health, with no significant differences between groups. Although not statistically significant, the prevalence of methicillin-resistant <i>Staphylococcus aureus</i> colonization and methicillin-sensitive <i>Staphylococcus aureus</i> colonization in the                                                           |

|                   |              |                                                                                                                                                                                                                                                                                                                                                                                                                                                                                                                                                                        |                                                                                                                                                         |                                                                                                                                                                                                                                                                                                                                                                                                                                    |
|-------------------|--------------|------------------------------------------------------------------------------------------------------------------------------------------------------------------------------------------------------------------------------------------------------------------------------------------------------------------------------------------------------------------------------------------------------------------------------------------------------------------------------------------------------------------------------------------------------------------------|---------------------------------------------------------------------------------------------------------------------------------------------------------|------------------------------------------------------------------------------------------------------------------------------------------------------------------------------------------------------------------------------------------------------------------------------------------------------------------------------------------------------------------------------------------------------------------------------------|
|                   |              | Control group: standard oral hygiene care (not specified) for ten days.                                                                                                                                                                                                                                                                                                                                                                                                                                                                                                | colonization assessed by culture                                                                                                                        | control group almost doubled (from 4.8% to 9.5%), while in the intervention group it decreased (from 20.8% to 16.7%).                                                                                                                                                                                                                                                                                                              |
| Dai et al., 2017a | Experimental | 74 participants in rehabilitation, diagnosed with moderate to severe stroke (Barthel Index < 70), evaluated at three months and 57 evaluated at six months;<br>Intervention group: instructions for oral hygiene with electric toothbrush, commercial toothpaste and 0.2% chlorhexidine oral solution for rinsing, for three months and reassessed three months after the end of the study;<br>Control group: instructions for oral hygiene with manual toothbrush and commercial toothpaste, for three months and reassessed three months after the end of the study. | Oral hygiene status, assessed by the Silness and Loe Plaque Index, and gingival bleeding, assessed by the Gingival Bleeding Index                       | Significant reduction in the percentage of areas with moderate to abundant plaque ( $p < 0.001$ ) and with gingival bleeding ( $p < 0.05$ ). In the intervention group, there was significantly less plaque and gingival bleeding than in the control group, controlling for other factors at the end of the study period (both $p < 0.001$ ) and in the observation period (plaque: $p < 0.05$ , gingival bleeding: $p < 0.01$ ). |
| Dai et al., 2017b | Experimental | 74 participants in rehabilitation, diagnosed with moderate to severe stroke (Barthel Index < 70), evaluated at three months and 57 evaluated at six months;<br>Intervention group: instructions for oral hygiene with electric toothbrush, commercial toothpaste and 0.2% chlorhexidine oral solution for rinsing, for three months and reassessed three months after the end of the study;<br>Control group: instructions for oral hygiene with manual toothbrush and commercial toothpaste, for three months and reassessed three months after the end of the study. | Health-related quality of life and oral health assessed with SF-12, Oral Health Impact Profile-14, General Oral Health Assessment Index and Oral Health | Significant improvement in the oral health-related quality of life intervention group ( $p < 0.01$ ) than the control group participants and significant improvement in health-related quality of life ( $p < 0.05$ ) in the group intervention.                                                                                                                                                                                   |

|                  |              |                                                                                                                                                                                                                                                                                                                                                                                                                                                                                                                                                                                          | Transitional Scale                                                                                                                                                                             |                                                                                                                                                                                                                                                                                                                                                                     |
|------------------|--------------|------------------------------------------------------------------------------------------------------------------------------------------------------------------------------------------------------------------------------------------------------------------------------------------------------------------------------------------------------------------------------------------------------------------------------------------------------------------------------------------------------------------------------------------------------------------------------------------|------------------------------------------------------------------------------------------------------------------------------------------------------------------------------------------------|---------------------------------------------------------------------------------------------------------------------------------------------------------------------------------------------------------------------------------------------------------------------------------------------------------------------------------------------------------------------|
| Dai et al., 2019 | Experimental | <p>74 participants in rehabilitation, diagnosed with moderate to severe stroke (Barthel Index &lt; 70), evaluated at three months and 57 evaluated at six months;</p> <p>Intervention group: instructions for oral hygiene with electric toothbrush, commercial toothpaste and 0.2% chlorhexidine oral solution for rinsing, for three months and reassessed three months after the end of the study;</p> <p>Control group: instructions for oral hygiene with manual toothbrush and commercial toothpaste, for three months and reassessed three months after the end of the study.</p> | Opportunistic pathogens in the oral cavity identified through culture                                                                                                                          | No significant differences in the prevalence of opportunistic pathogens throughout the study. Significant reduction in viable <i>Staphylococcus aureus</i> count ( $p < 0.05$ ) at the end of the study in the intervention group. No statistically significant differences between groups in counting and viability of yeasts and anaerobic gram-negative bacilli. |
| Lam et al., 2013 | Experimental | <p>102 participants in rehabilitation, diagnosed with moderate to severe stroke (Barthel Index &lt; 70);</p> <p>Group I: instructions for performing oral hygiene;</p> <p>Group II: instructions for performing oral hygiene and use of 0.2% chlorhexidine, oral solution, for rinsing twice a day for three weeks;</p> <p>Group III: instructions for performing oral hygiene; use of 0.2% chlorhexidine, oral solution, for rinsing twice a day for three weeks and assistance in oral hygiene by a health professional twice a week for three weeks.</p>                              | Oral functional status assessed with questions about ability to brush teeth and place dentures, dental plaque by the Silness and Loe Plaque Index, and gingival bleeding by the Ainamo and Bay | Poor oral hygiene and negligence in oral hygiene practices were observed at baseline. Significant reduction in bacterial plaque in the 2 groups that received chlorhexidine compared to group I ( $p < 0.001$ ) and reduction in gingival bleeding score 3 to 4 times greater in the groups that received chlorhexidine.                                            |

|                         |                                |                                                                                                                                                                                                                                                                                                                                                                                                                                                                                                                                       | Gingival Bleeding Index                                                                                          |                                                                                                                                                                                                             |
|-------------------------|--------------------------------|---------------------------------------------------------------------------------------------------------------------------------------------------------------------------------------------------------------------------------------------------------------------------------------------------------------------------------------------------------------------------------------------------------------------------------------------------------------------------------------------------------------------------------------|------------------------------------------------------------------------------------------------------------------|-------------------------------------------------------------------------------------------------------------------------------------------------------------------------------------------------------------|
| Lam et al., 2013        | Experimental                   | 102 participants in rehabilitation, diagnosed with moderate to severe stroke (Barthel Index < 70);<br>Group I: instructions for performing oral hygiene;<br>Group II: instructions for performing oral hygiene and use of 0.2% chlorhexidine, oral solution, for rinsing twice a day for three weeks;<br>Group III: instructions for performing oral hygiene; use of 0.2% chlorhexidine, oral solution, for rinsing twice a day for three weeks and assistance in oral hygiene by a health professional twice a week for three weeks. | Opportunistic pathogens in the oral cavity identified through culture                                            | No significant differences between groups in the count of opportunistic pathogens in the oral cavity.                                                                                                       |
| Lam et al., 2014        | Experimental                   | 102 participants in rehabilitation, diagnosed with moderate to severe stroke (Barthel Index < 70);<br>Group I: instructions for performing oral hygiene<br>Group II: instructions for performing oral hygiene and use of 0.2% chlorhexidine, oral solution, for rinsing twice a day for three weeks;<br>Group III: instructions for performing oral hygiene; use of 0.2% chlorhexidine, oral solution, for rinsing twice a day for three weeks and assistance in oral hygiene by a health professional twice a week for three weeks.  | Oral health-related quality of life assessed with Oral Health Impact Profile-14 and Oral Health Transition Scale | Significant improvement (p<0.05) in relation to oral health-related quality of life in all groups throughout the study, with no statistically significant differences between groups.                       |
| Murray & Scholten, 2018 | Quasi-experimental time-series | 89 participants, with and without dysphagia, (n=12 and n=77 respectively) in stroke rehabilitation;<br>Intervention: oral hygiene protocol with brushing the teeth or dentures twice a day with toothpaste (after breakfast and at bedtime) and rinsing the oral cavity                                                                                                                                                                                                                                                               | Oral health assessed with the Oral Health Assessment Tool                                                        | At the beginning of the study, the difference in the oral health score was statistically significant, with worse results for the dysphagic participants (p<0.27) and which remained at the end of the study |

|                       |                                                                                                                                              |                                                                                                                                                                                                                                                                                                                                                                                                                                                                                                                         |                       |                                                                                                                                                                                                                                          |
|-----------------------|----------------------------------------------------------------------------------------------------------------------------------------------|-------------------------------------------------------------------------------------------------------------------------------------------------------------------------------------------------------------------------------------------------------------------------------------------------------------------------------------------------------------------------------------------------------------------------------------------------------------------------------------------------------------------------|-----------------------|------------------------------------------------------------------------------------------------------------------------------------------------------------------------------------------------------------------------------------------|
|                       |                                                                                                                                              | after lunch. The care before consisted of brushing the teeth once a day in the morning. Evaluation before protocol implementation and seven days later.                                                                                                                                                                                                                                                                                                                                                                 |                       | ( $p < 0.23$ ). At the end of the study, participants with dysphagia showed a statistically significant improvement in their oral health score ( $p < 0.24$ ). There was no difference in non-dysphagic patients.                        |
| Seedat & Penn, 2016   | Quasi-experimental with comparison group by retrospective document analysis                                                                  | 32 participants with stroke and 14 with traumatic brain injury, dysphagia, in rehabilitation, equally distributed by intervention group and comparison group;<br>Intervention: brushing teeth with toothpaste before and after breakfast and after lunch, snack and dinner, followed by rinsing the oral cavity with an oral solution (not specified).                                                                                                                                                                  | Aspiration pneumonia  | Of the participants, seven had aspiration pneumonia, all of them in the comparison group.                                                                                                                                                |
| Sørensen et al., 2013 | Quasi-experimental with an internal control group by retrospective document analysis and an external control group (neighboring institution) | 146 participants with moderate to severe dysphagia, diagnosed with acute-phase stroke;<br>Intervention group: tooth brushing (frequency not identified), oral protection and hydration and rinsing with 0.12% chlorhexidine oral solution, which in the case of patients with severe dysphagia was performed twice a day; use of synthetic saliva in patients not fed orally;<br>Internal control group: unsystematic and arbitrary oral care;<br>External control group: unsystematic and arbitrary oral hygiene care. | Rx verified pneumonia | The incidence of Rx-checked pneumonia was 4 out of 58 (7%) in the intervention group, compared with 16 out of 58 (28%) in the internal control group ( $p < 0.01$ ) and 8 out of 30 (27 %) in the external control group ( $p < 0.05$ ). |



|                        |                                       |                                                                                                                                                                                                                                                                                                            |                                    |                                                                                                                                                                                                                                                                                                                                                                                                            |
|------------------------|---------------------------------------|------------------------------------------------------------------------------------------------------------------------------------------------------------------------------------------------------------------------------------------------------------------------------------------------------------|------------------------------------|------------------------------------------------------------------------------------------------------------------------------------------------------------------------------------------------------------------------------------------------------------------------------------------------------------------------------------------------------------------------------------------------------------|
| Wagner et al.,<br>2016 | Quasi-<br>experimental<br>time-series | 1656 participants diagnosed with acute-phase stroke (n=949 in the intervention group);<br>Intervention: oral hygiene protocol using a kit consisting of oral solutions containing 0.05% cetylpyridinium chloride and 1.5% hydrogen peroxide, a suction toothbrush, sponge and oropharyngeal suction probe. | Hospital<br>acquired-<br>pneumonia | The unadjusted incidence of hospital-acquired pneumonia was lower in the intervention group compared to the control (14 vs. 10.33%; p=0.022) with an unadjusted odds ratio of 0.68 (95% CI 0, 48-0.95; p=0.022). After adjusting for confounding factors, the odds ratio of hospital-acquired pneumonia in the intervention group continued to be significantly lower at 0.71 (95% CI 0.51-0.98; p=0.041). |
|------------------------|---------------------------------------|------------------------------------------------------------------------------------------------------------------------------------------------------------------------------------------------------------------------------------------------------------------------------------------------------------|------------------------------------|------------------------------------------------------------------------------------------------------------------------------------------------------------------------------------------------------------------------------------------------------------------------------------------------------------------------------------------------------------------------------------------------------------|

|                                                |                                                                                                                                                                                                                                                                                                          |
|------------------------------------------------|----------------------------------------------------------------------------------------------------------------------------------------------------------------------------------------------------------------------------------------------------------------------------------------------------------|
| Clinical question                              | Does systematic screening for nutritional risk, compared to standard care, in stroke patients with dysphagia decrease mortality and morbidity or improve health outcomes in stroke patients?                                                                                                             |
| Population                                     | Stroke patients with dysphagia                                                                                                                                                                                                                                                                           |
| Intervention                                   | screening for nutritional risk                                                                                                                                                                                                                                                                           |
| Comparison                                     | Standard care                                                                                                                                                                                                                                                                                            |
| Outcome                                        | Morbidity, mortality, quality of life, functional outcome, length of stay, nutritional status.                                                                                                                                                                                                           |
| List of most important topics and search terms | Stroke; cerebrovascular accident; apoplexy; dysphagia; swallowing disorders; screening; nutrition disorders; nutrition; length of stay; morbidity; death; poor outcome.                                                                                                                                  |
| First search                                   | Seven guidelines: Boulanger et al., 2018; Burgos et al., 2018; Direção-Geral da Saúde, 2019; Hebert et al., 2016; Stroke Foundation, 2019.; National Collaborating Center for Chronic Conditions, 2019; Powers et al., 2019<br><br>Two systematic reviews: Feinberg et al., 2017; Geeganage et al., 2012 |

|                                                |                                                                                                                                                                                                                                                                                                 |
|------------------------------------------------|-------------------------------------------------------------------------------------------------------------------------------------------------------------------------------------------------------------------------------------------------------------------------------------------------|
| Clinical question                              | Does NGT feeding in patients with severe dysphagia, compared to other enteric feeding strategies, decrease mortality and morbidity or improve health outcomes in stroke patients?                                                                                                               |
| Population                                     | Stroke patients with dysphagia                                                                                                                                                                                                                                                                  |
| Intervention                                   | NGT feeding                                                                                                                                                                                                                                                                                     |
| Comparison                                     | Standard or other feeding strategies                                                                                                                                                                                                                                                            |
| Outcome                                        | Complications (adverse events), morbidity, mortality, quality of life, functional outcome, length of stay, nutritional status.                                                                                                                                                                  |
| List of most important topics and search terms | Stroke; cerebrovascular accident; apoplexy; nutrition disorders; nutrition; nutrition therapy; feeding methods; enteral nutrition; tube feeding; gastrostomy; enterostomy; length of stay; morbidity; death; poor outcome.                                                                      |
| First search                                   | Seven guidelines: Boulanger et al., 2018; Burgos et al., 2018; Hebert et al., 2016; Stroke Foundation, 2019.; National Collaborating Center for Chronic Conditions, 2019; Powers et al., 2019; Winstein et al., 2016.<br><br>Two systematic reviews: Geeganage et al., 2012; Gomes et al., 2015 |
| Second search for updated evidence             | Four non-randomized studies: Joundi et al., 2018; Kim et al., 2018; Kwak et al., 2018; Wang et al., 2019                                                                                                                                                                                        |

|                                                |                                                                                                                                                                                                                                                                |
|------------------------------------------------|----------------------------------------------------------------------------------------------------------------------------------------------------------------------------------------------------------------------------------------------------------------|
| Clinical question                              | Which therapeutic interventions have the most significant results in the recovery of swallowing function and airway safety?                                                                                                                                    |
| Population                                     | Stroke patients with dysphagia                                                                                                                                                                                                                                 |
| Intervention                                   | Therapeutic intervention for the treatment/rehabilitation of dysphagia                                                                                                                                                                                         |
| Comparison                                     | Standard care                                                                                                                                                                                                                                                  |
| Outcome                                        | Swallow ability, functional outcome, complications (adverse events); morbidity; mortality; quality of life; respiratory complications/aspiration pneumonia                                                                                                     |
| List of most important topics and search terms | stroke; cerebrovascular accident; apoplexy; dysphagia; swallowing disorders; swallowing function; rehabilitation; therapies; treatment; death; length of stay; morbidity; aspiration; functional outcome                                                       |
| First search                                   | Three guidelines: Burgos et al., 2018; Hebert et al., 2016; Stroke Foundation, 2019.; National Collaborating Center for Chronic Conditions, 2019; Winstein et al, 2016<br><br>One systematic review: Bath et al., 2018; Chiang et al., 2019; Tian et al., 2019 |
| Second search for updated evidence             | Nine studies retrieved (next table).                                                                                                                                                                                                                           |

| Autor                 | Objective/participants/intervention                                                                                                                                                                                                                                                                                                                                                                                                                                                                  | Outcome measurements                                                                                                                                                                                                                                    | Results                                                                                                                                                                                                                                                                                                                                              |
|-----------------------|------------------------------------------------------------------------------------------------------------------------------------------------------------------------------------------------------------------------------------------------------------------------------------------------------------------------------------------------------------------------------------------------------------------------------------------------------------------------------------------------------|---------------------------------------------------------------------------------------------------------------------------------------------------------------------------------------------------------------------------------------------------------|------------------------------------------------------------------------------------------------------------------------------------------------------------------------------------------------------------------------------------------------------------------------------------------------------------------------------------------------------|
| Kim & Park, 2019      | <p>Using a computer application, 30 participants were randomly divided into two groups, with the aim of investigating the effect of a head flexion resistance exercise in participants with dysphagia, with the aid of a device.</p> <p>Intervention (n=15): head flexion resistance exercises with device support + standard care five days a week for six weeks;</p> <p>Control (n=15): standard care five days a week for six weeks.</p>                                                          | Use of the Functional Oral Intake Scale to assess swallowing function and assess penetration/aspiration using videofluoroscopy.                                                                                                                         | Compared with the control group, the intervention group showed statistically significant improvement in penetration/aspiration and the Functional Oral Intake Scale ( $p < 0.001$ , both). NGT removal rates were 25% and 15% in the intervention and control groups, respectively.                                                                  |
| Krajczyk et al., 2019 | <p>Aiming to evaluate the effectiveness of a therapeutic program consisting of orofacial muscle strengthening exercises, breathing exercises and strengthening and re-education and, when appropriate, thermal stimulation and mobilization of the laryngo-hyoid complex, 60 participants were randomly allocated into two groups, by closed envelope technique.</p> <p>Intervention (n=30): daily therapeutic program for 15 days;</p> <p>Control (n=30): standard care during the same period.</p> | The following parameters were evaluated at the beginning and end of the program: vocal quality before and after ingesting 50 ml of water; swallowing time (in seconds); number of swallows and peripheral oxygen saturation assessed by pulse oximetry. | Statistically significant difference between groups at the end of the intervention, in favor of the intervention group, for the parameters: swallowing reflex ( $p = 0.00001$ ), cough reflex ( $p = 0.0009$ ), vocal quality ( $p = 0.00001$ ), reduction in swallowing time ( $p = 0.02$ ) and reduction in the number of swallows ( $p = 0.02$ ). |
| Moon et al., 2018     | Nineteen participants were randomly allocated through a computer application into two groups in order to assess the effects of precision training and                                                                                                                                                                                                                                                                                                                                                | Iowa Oral Performance Instrument for the assessment of maximum isometric tongue                                                                                                                                                                         | There were statistically significant improvements before and after treatment in both groups for all measured variables. No differences between groups, except for the                                                                                                                                                                                |

|                             |                                                                                                                                                                                                                                                                                                            |                                                                                                                                                                                                   |                                                                                                                                                                                                                                                                                                                                                                                                                                                                                                                                                                                                                                                                                             |
|-----------------------------|------------------------------------------------------------------------------------------------------------------------------------------------------------------------------------------------------------------------------------------------------------------------------------------------------------|---------------------------------------------------------------------------------------------------------------------------------------------------------------------------------------------------|---------------------------------------------------------------------------------------------------------------------------------------------------------------------------------------------------------------------------------------------------------------------------------------------------------------------------------------------------------------------------------------------------------------------------------------------------------------------------------------------------------------------------------------------------------------------------------------------------------------------------------------------------------------------------------------------|
|                             | <p>tongue pressure strength on swallowing function and quality of life.</p> <p>Intervention (n=8): tongue press force and precision training + standard care 5 times a week for eight weeks;</p> <p>Control (n=8): standard care 5 times a week for eight weeks.</p>                                       | <p>pressure, the Mann Assessment of Swallowing Ability to Assess Dysphagia and Swallowing-Quality of Life for Quality of Life.</p>                                                                | <p>maximum posterior isometric pressure of the tongue, which showed no statistically significant improvement in the control group and in the item "tongue movement" in the evaluation performed using the Mann Assessment of Swallowing Ability with a statistically significant difference in favor of the group intervention.</p>                                                                                                                                                                                                                                                                                                                                                         |
| <p>Park et al., 2019</p>    | <p>24 participants were randomly allocated to evaluate the effect of forced swallowing training on tongue strength and ability to swallow.</p> <p>Intervention (n=12): forced swallowing training five times a week for four weeks;</p> <p>Control (n=12): standard care 5 times a week for four weeks</p> | <p>Iowa Oral Performance Instrument for assessment of maximum isometric tongue pressure and swallowing function was assessed by videofluoroscopy using the Videofluoroscopic Dysphagia Scale.</p> | <p>Statistically significant differences in the two groups before and after the intervention and at the end of the intervention there was a statistically significant difference in the measurement of anterior and posterior tongue strength (<math>p &lt; 0.046</math> and <math>p &lt; 0.042</math> respectively) in favor of the intervention group. As for the swallowing function, both groups showed significant improvements in the oral and pharyngeal phase before and after treatment, and at the end of the intervention there was a statistically significant difference (<math>p &lt; 0.017</math>) between groups in the oral phase in favor of the intervention group .</p> |
| <p>Ploumis et al., 2018</p> | <p>With the aim of evaluating the effectiveness of isometric exercises for strengthening the cervical spine in post-stroke dysphagic adults, 70</p>                                                                                                                                                        | <p>Penetration/aspiration evaluation using videofluoroscopy.</p>                                                                                                                                  | <p>Statistically significant differences between groups in penetration/aspiration (<math>p &lt; 0.001</math>) in favor of the intervention group.</p>                                                                                                                                                                                                                                                                                                                                                                                                                                                                                                                                       |

|                         |                                                                                                                                                                                                                                                                                                                                                                                                                                                     |                                                                                                                                          |                                                                                                                                                                                                                                            |
|-------------------------|-----------------------------------------------------------------------------------------------------------------------------------------------------------------------------------------------------------------------------------------------------------------------------------------------------------------------------------------------------------------------------------------------------------------------------------------------------|------------------------------------------------------------------------------------------------------------------------------------------|--------------------------------------------------------------------------------------------------------------------------------------------------------------------------------------------------------------------------------------------|
|                         | <p>participants were randomly distributed into two groups, per sealed envelope.</p> <p>Intervention (n=37): isometric cervical strengthening exercises + standard care for 12 weeks;</p> <p>Control (n=33): standard care for 12 weeks.</p>                                                                                                                                                                                                         |                                                                                                                                          |                                                                                                                                                                                                                                            |
| Simonelli et al., 2019  | <p>Researchers compared the use of NMES with standard care in a group of 31 participants randomly distributed into two groups with a randomization table.</p> <p>Intervention (n=16): neuromuscular electrical stimulation + standard care five days a week for five days;</p> <p>Control (n=15): standard care five days a week for five days.</p>                                                                                                 | Use of the Functional Oral Intake Scale to assess swallowing function and assess penetration/aspiration using videofluoroscopy.          | Statistically significant differences in both groups in the assessment before and after treatment, however the intervention group achieved better scores on the Functional Oral Intake Scale and on the penetration/aspiration assessment. |
| Tarameshlu et al., 2019 | <p>Aiming to evaluate the effect of RTMS on swallowing, 18 participants were randomly distributed into three groups, by a sealed envelope.</p> <p>Intervention 1 (n=6): transcranial magnetic stimulation five consecutive days + standard care three times a week for six weeks;</p> <p>Intervention 2(n=6): transcranial magnetic stimulation for five consecutive days;</p> <p>Control(n=6): standard care three times a week for six weeks;</p> | Use of the Functional Oral Intake Scale to assess swallowing function and the Mann Assessment of Swallowing Ability to assess dysphagia. | All groups had statistically significant improvements between the beginning and the end of the study, however, these were significantly greater in the intervention group 1.                                                               |
| Ünlüer et al., 2019     | <p>28 participants were randomly distributed into two groups, by closed envelope, to identify whether the</p>                                                                                                                                                                                                                                                                                                                                       | The swallowing function was evaluated by videofluoroscopy                                                                                | No differences between groups in the assessment of swallowing function. A                                                                                                                                                                  |

|                        |                                                                                                                                                                                                                                                                                                                                                                                                                                      |                                                                                                                                                                                                  |                                                                                                                                                                                                                                                        |
|------------------------|--------------------------------------------------------------------------------------------------------------------------------------------------------------------------------------------------------------------------------------------------------------------------------------------------------------------------------------------------------------------------------------------------------------------------------------|--------------------------------------------------------------------------------------------------------------------------------------------------------------------------------------------------|--------------------------------------------------------------------------------------------------------------------------------------------------------------------------------------------------------------------------------------------------------|
|                        | <p>application of low-frequency transcranial magnetic stimulation can increase the effect of the conventional treatment of swallowing and the quality of life.</p> <p>Intervention (n=15): low frequency transcranial magnetic stimulation in the unaffected hemisphere in the last week of treatment + standard care three times a week for four weeks;</p> <p>Control (n=13): standard care three times a week for four weeks.</p> | <p>based on the measurement of oral transit time of different volumes and consistency and penetration and aspiration. The Swallowing-Quality of Life was used to assess the Quality of Life.</p> | <p>significant improvement was seen in the parameters of appetite, fear of eating and mental health of the quality of life assessment in the intervention group compared to the control group (p &lt; 0.05).</p>                                       |
| <p>Wu et al., 2019</p> | <p>Aiming to assess the effectiveness of acupuncture in the treatment of dysphagia, 128 participants were randomly distributed using a table of random numbers, in two groups.</p> <p>Intervention (n=63): acupuncture + standard care five times a week for three weeks;</p> <p>Control (n=65): standard care five times a week for three weeks.</p>                                                                                | <p>Swallowing capacity assessed with an instrument developed by Fujishima Ichiro.</p>                                                                                                            | <p>Statistically significant differences were observed between groups at the end of treatment for cortical and internal capsule/basal ganglia/diencephalon infarcts patients. No group differences for brainstem and cerebellum infarcts patients.</p> |



|                                                |                                                                                                                                                                                                     |
|------------------------------------------------|-----------------------------------------------------------------------------------------------------------------------------------------------------------------------------------------------------|
| Clinical question                              | Does modifying food and liquids consistency, compared to standard feeding, decrease mortality and morbidity, or improve health outcomes in stroke patients?                                         |
| Population                                     | Stroke patients with dysphagia                                                                                                                                                                      |
| Intervention                                   | Modification of food consistencies and liquid viscosity                                                                                                                                             |
| Comparison                                     | Standard or non-modified feeding                                                                                                                                                                    |
| Outcome                                        | Efficacy (swallowing ability) and safety (respiratory complications) of swallowing and quality of life                                                                                              |
| List of most important topics and search terms | Stroke; cerebrovascular accident; apoplexy; dysphagia; swallowing disorders; liquid; food; texture; consistency; thick*; viscosity                                                                  |
| First search                                   | Three guidelines: Burgos et al., 2018; Stroke Foundation, 2019; Wirth et al., 2016..<br><br>Four systematic reviews: Beck et al., 2018; Newman et al., 2016; Steele et al., 2015; Swan et al., 2015 |
| Second search for updated evidence             | Five observational studies: Bolivar-Prados et al., 2019; Crary et al., 2015; McCurtin et al., 2018; Miles et al., 2018; Vilardell et al., 2015.                                                     |

## References

- Ab Malik, N., Abdul Razak, F., Mohamad Yatim, S., Lam, O. L. T., Jin, L., Li, L. S. W., & McGrath, C. (2018). Oral Health Interventions Using Chlorhexidine—Effects on the Prevalence of Oral Opportunistic Pathogens in Stroke Survivors: A Randomized Clinical Trial. *Journal of Evidence-Based Dental Practice*, *18*(2), 99–109.  
<https://doi.org/10.1016/j.jebdp.2017.08.002>
- Ajwani, S., Jayanti, S., Burkolter, N., Anderson, C., Bhole, S., Itaoui, R., & George, A. (2017). Integrated oral health care for stroke patients – a scoping review. *Journal of Clinical Nursing*, *26*(7–8), 891–901. <https://doi.org/10.1111/JOCN.13520>
- Baijens, L. W., Clavé, P., Cras, P., Ekberg, O., Forster, A., Kolb, G. F., Leners, J.-C., Masiero, S., Mateos-Nozal, J., Ortega, O., Smithard, D. G., Speyer, R., & Walshe, M. (2016). European Society for Swallowing Disorders & European Union Geriatric Medicine Society white paper: oropharyngeal dysphagia as a geriatric syndrome. *Clinical Interventions in Aging*, *11*, 1403–1428. <https://doi.org/10.2147/CIA.S107750>
- Bath, P. M., Lee, H. S., & Everton, L. F. (2018). Swallowing therapy for dysphagia in acute and subacute stroke. In *Cochrane Database of Systematic Reviews* (Vol. 2018, Issue 10). John Wiley and Sons Ltd. <https://doi.org/10.1002/14651858.CD000323.pub3>
- Beck, A. M., Kjaersgaard, A., Hansen, T., & Poulsen, I. (2018). Systematic review and evidence based recommendations on texture modified foods and thickened liquids for adults (above 17 years) with oropharyngeal dysphagia – An updated clinical guideline. *Clinical Nutrition*, *37*(6), 1980–1991. <https://doi.org/10.1016/j.clnu.2017.09.002>
- Bolivar-Prados, M., Rofes, L., Arreola, V., Guida, S., Nascimento, W. v., Martin, A., Vilardell, N., Fernández, O. O., Ripken, D., Lansink, M., & Clavé, P. (2019). Effect of a gum-based thickener on the safety of swallowing in patients with poststroke oropharyngeal dysphagia. *Neurogastroenterology & Motility*, *31*(11), e13695.  
<https://doi.org/10.1111/NMO.13695>
- Boulanger, J. M., Lindsay, M. P., Gubitz, G., Smith, E. E., Stotts, G., Foley, N., Bhogal, S., Boyle, K., Braun, L., Goddard, T., Heran, M. K. S., Kanya-Forster, N., Lang, E., Lavoie, P., McClelland, M., O’Kelly, C., Pageau, P., Pettersen, J., Purvis, H., ... Butcher, K. (2018). Canadian Stroke Best Practice Recommendations for Acute Stroke Management: Prehospital, Emergency Department, and Acute Inpatient Stroke Care, 6th Edition, Update 2018. *International Journal of Stroke*, *13*(9), 949–984.  
<https://doi.org/10.1177/1747493018786616>

- Brady, M., Furlanetto, D., Hunter, R. v., Lewis, S., & Milne, V. (2006). Staff-led interventions for improving oral hygiene in patients following stroke. *Cochrane Database of Systematic Reviews*, 4. <https://doi.org/10.1002/14651858.CD003864.PUB2>
- Burgos, R., Bretón, I., Cereda, E., Desport, J. C., Dziewas, R., Genton, L., Gomes, F., Jesús, P., Leischker, A., Muscaritoli, M., Poulia, K. A., Preiser, J. C., van der Marck, M., Wirth, R., Singer, P., & Bischoff, S. C. (2018). ESPEN guideline clinical nutrition in neurology. *Clinical Nutrition*, 37(1), 354–396. <https://doi.org/10.1016/j.clnu.2017.09.003>
- Chen, H.-J., Chen, J.-L., Chen, C.-Y., Lee, M., Chang, W.-H., & Huang, T.-T. (2019). Effect of an Oral Health Programme on Oral Health, Oral Intake, and Nutrition in Patients with Stroke and Dysphagia in Taiwan: A Randomised Controlled Trial. *International Journal of Environmental Research and Public Health* 2019, Vol. 16, Page 2228, 16(12), 2228. <https://doi.org/10.3390/IJERPH16122228>
- Chiang, C. F., Lin, M. T., Hsiao, M. Y., Yeh, Y. C., Liang, Y. C., & Wang, T. G. (2019). Comparative Efficacy of Noninvasive Neurostimulation Therapies for Acute and Subacute Poststroke Dysphagia: A Systematic Review and Network Meta-analysis. *Archives of Physical Medicine and Rehabilitation*, 100(4), 739-750.e4. <https://doi.org/10.1016/j.apmr.2018.09.117>
- Chiggs, E., Gatens, C., Genter, L., Musto, M., Dubis-Bohn, A., Gliemmo, M., Dudley, K., Holloman, C., Hoet, A. E., & Landers, T. (2014). Pilot study of an oral care protocol on poststroke survivors. *Rehabilitation Nursing*, 39(6), 294–304. <https://doi.org/10.1002/rnj.154>
- Crary, M. A., Carnaby, G. D., Shabbir, Y., Miller, L., & Silliman, S. (2015). Clinical Variables Associated with Hydration Status in Acute Ischemic Stroke Patients with Dysphagia. *Dysphagia* 2015 31:1, 31(1), 60–65. <https://doi.org/10.1007/S00455-015-9658-6>
- Dai, R., Lam, O. L. T., Lo, E. C. M., Li, L. S. W., & McGrath, C. (2017a). A randomized clinical trial of oral hygiene care programmes during stroke rehabilitation. *Journal of Dentistry*, 61, 48–54. <https://doi.org/10.1016/j.jdent.2017.04.001>
- Dai, R., Lam, O. L. T., Lo, E. C. M., Li, L. S. W., & McGrath, C. (2017b). Oral health-related quality of life in patients with stroke: A randomized clinical trial of oral hygiene care during outpatient rehabilitation. *Scientific Reports*, 7(1). <https://doi.org/10.1038/s41598-017-07666-y>
- Dai, R., Lam, O. L. T., Lo, E. C. M., Li, L. S. W., & McGrath, C. (2019). Effect of oral hygiene programmes on oral opportunistic pathogens during stroke rehabilitation. *Oral Diseases*, 25(2), 617–633. <https://doi.org/10.1111/odi.13005>

- Eltringham, S. A., Kilner, K., Gee, M., Sage, K., Bray, B. D., Smith, C. J., & Pownall, S. (2019). Factors Associated with Risk of Stroke-Associated Pneumonia in Patients with Dysphagia: A Systematic Review. *Dysphagia* 2019 35:5, 35(5), 735–744.  
<https://doi.org/10.1007/S00455-019-10061-6>
- Feinberg, J., Nielsen, E. E., Korang, S. K., Halberg Engell, K., Nielsen, M. S., Zhang, K., Didriksen, M., Lund, L., Lindahl, N., Hallum, S., Liang, N., Xiong, W., Yang, X., Brunsgaard, P., Garioud, A., Safi, S., Lindschou, J., Kondrup, J., Gluud, C., & Jakobsen, J. C. (2017). Nutrition support in hospitalised adults at nutritional risk. In *Cochrane Database of Systematic Reviews* (Vol. 2017, Issue 5). John Wiley and Sons Ltd.  
<https://doi.org/10.1002/14651858.CD011598.pub2>
- Geeganage, C., Beavan, J., Ellender, S., & Bath, P. M. (2012). Interventions for dysphagia and nutritional support in acute and subacute stroke. *Cochrane Database of Systematic Reviews*, 10. <https://doi.org/10.1002/14651858.CD000323.PUB2>
- Gomes, C. A., Andriolo, R. B., Bennett, C., Lustosa, S. A., Matos, D., Waisberg, D. R., & Waisberg, J. (2015). Percutaneous endoscopic gastrostomy versus nasogastric tube feeding for adults with swallowing disturbances. In *Cochrane Database of Systematic Reviews* (Vol. 2015, Issue 5). John Wiley and Sons Ltd.  
<https://doi.org/10.1002/14651858.CD008096.pub4>
- Han, T. S., Lean, M. E., Fluck, D., Affley, B., Gulli, G., Patel, T., Barrett, C., Kakar, P., Sharma, S., & Sharma, P. (2018). Impact of delay in early swallow screening on pneumonia, length of stay in hospital, disability and mortality in acute stroke patients. *European Journal of Clinical Nutrition* 2018 72:11, 72(11), 1548–1554. <https://doi.org/10.1038/s41430-018-0148-4>
- Hebert, D., Lindsay, M. P., McIntyre, A., Kirton, A., Rumney, P. G., Bagg, S., Bayley, M., Dowlatshahi, D., Dukelow, S., Garnhum, M., Glasser, E., Halabi, M. lou, Kang, E., MacKay-Lyons, M., Martino, R., Rochette, A., Rowe, S., Salbach, N., Semenko, B., ... Teasell, R. (2016). Canadian stroke best practice recommendations: Stroke rehabilitation practice guidelines, update 2015. *International Journal of Stroke*, 11(4), 459–484.  
<https://doi.org/10.1177/1747493016643553>
- Joundi, R. A., Saposnik, G., Martino, R., Fang, J., Porter, J., & Kapral, M. K. (2018). Outcomes among patients with direct enteral vs nasogastric tube placement after acute stroke. *Neurology*, 90(7), e544–e552. <https://doi.org/10.1212/WNL.0000000000004962>
- Kelly, T. (2010). Review of the evidence to support oral hygiene in stroke patients. *Nursing Standard (Royal College of Nursing (Great Britain))* : 1987, 24(37), 35–38.  
<https://doi.org/10.7748/NS2010.05.24.37.35.C7778>

- Kim, G., Baek, S., Park, H., Kang, E. K., & Lee, G. (2018). Effect of Nasogastric Tube on Aspiration Risk: Results from 147 Patients with Dysphagia and Literature Review. *Dysphagia* 2018 33:6, 33(6), 731–738. <https://doi.org/10.1007/S00455-018-9894-7>
- Kim, H. H., & Park, J. S. (2019). Efficacy of modified chin tuck against resistance exercise using hand-free device for dysphagia in stroke survivors: A randomised controlled trial. *Journal of Oral Rehabilitation*, 46(11), 1042–1046. <https://doi.org/10.1111/joor.12837>
- Krajczyk, E., Krajczyk, M., Luniewski, J., Bogacz, K., & Szczegielniak, J. (2019). Assessment of the effects of dysphagia therapy in patients in the early post-stroke period: A randomised controlled trial. *Neurologia i Neurochirurgia Polska*, 53(6), 428–434. <https://doi.org/10.5603/PJNNS.A2019.0053>
- Kwak, H.-J., Kim, L., Ryu, B.-J., Kim, Y.-H., Park, S.-W., Cho, D.-G., Lee, C.-J., & Ha, K.-W. (2018). Influence of Nasogastric Tubes on Swallowing in Stroke Patients: Measuring Hyoid Bone Movement With Ultrasonography. *Annals of Rehabilitation Medicine*, 42(4), 551–559. <https://doi.org/10.5535/ARM.2018.42.4.551>
- Kwok, C., McIntyre, A., Janzen, S., Mays, R., & Teasell, R. (2015). Oral care post stroke: a scoping review. *Journal of Oral Rehabilitation*, 42(1), 65–74. <https://doi.org/10.1111/JOOR.12229>
- Lam, O. L., McMillan, A. S., Samaranayake, L. P., Li, L. S., & McGrath, C. (2013). Randomized clinical trial of oral health promotion interventions among patients following stroke. *Archives of Physical Medicine and Rehabilitation*, 94(3), 435–443. <https://doi.org/10.1016/j.apmr.2012.10.024>
- Lam, O. L. T., McMillan, A. S., Li, L. S. W., & McGrath, C. (2014). Predictors of oral health-related quality of life in patients following stroke. *Journal of Rehabilitation Medicine*, 46(6), 520–526. <https://doi.org/10.2340/16501977-1806>
- Lam, O. L. T., McMillan, A. S., Samaranayake, L. P., Li, L. S. W., & Mccrath, C. (2013). Effect of oral hygiene interventions on opportunistic pathogens in patients after stroke. *American Journal of Infection Control*, 41(2), 149–154. <https://doi.org/10.1016/j.ajic.2012.02.020>
- Lyons, M., Smith, C., Boaden, E., Brady, M. C., Brocklehurst, P., Dickinson, H., Hamdy, S., Higham, S., Langhorne, P., Lightbody, C., McCracken, G., Medina-Lara, A., Sproson, L., Walls, A., & Watkins, D. C. (2018). Oral care after stroke: Where are we now? *European Stroke Journal*, 3(4), 347. <https://doi.org/10.1177/2396987318775206>
- McCurtin, A., Healy, C., Kelly, L., Murphy, F., Ryan, J., & Walsh, J. (2018). Plugging the patient evidence gap: what patients with swallowing disorders post-stroke say about thickened liquids\*. *International Journal of Language & Communication Disorders*, 53(1), 30–39. <https://doi.org/10.1111/1460-6984.12324>

- Miles, A., McFarlane, M., Scott, S., & Hunting, A. (2018). Cough response to aspiration in thin and thick fluids during FEES in hospitalized inpatients. *International Journal of Language & Communication Disorders, 53*(5), 909–918. <https://doi.org/10.1111/1460-6984.12401>
- Moon, J. H., Hahm, S. C., Won, Y. S., & Cho, H. Y. (2018). The effects of tongue pressure strength and accuracy training on tongue pressure strength, swallowing function, and quality of life in subacute stroke patients with dysphagia: A preliminary randomized clinical trial. *International Journal of Rehabilitation Research, 41*(3), 204–210. <https://doi.org/10.1097/MRR.0000000000000282>
- Murray, J., & Scholten, I. (2018). An oral hygiene protocol improves oral health for patients in inpatient stroke rehabilitation. *Gerodontology, 35*(1), 18–24. <https://doi.org/10.1111/GER.12309>
- National Collaborating Center for Chronic Conditions. (2019). *Stroke and transient ischaemic attack in over 16s: diagnosis and initial management NICE guideline*. (2019). [www.nice.org.uk/guidance/ng128](http://www.nice.org.uk/guidance/ng128)
- Newman, R., Vilardell, N., Clavé, P., & Speyer, R. (2016). Effect of Bolus Viscosity on the Safety and Efficacy of Swallowing and the Kinematics of the Swallow Response in Patients with Oropharyngeal Dysphagia: White Paper by the European Society for Swallowing Disorders (ESSD). *Dysphagia, 31*(2), 232–249. <https://doi.org/10.1007/s00455-016-9696-8>
- Oliveira, I. J., da Mota, L. A. N., Freitas, S. V., & Ferreira, P. L. (2019). Dysphagia screening tools for acute stroke patients available for nurses: A systematic review. *Nursing Practice Today, 6*(3). <https://doi.org/10.18502/npt.v6i3.1253>
- Oral Care of the Hospitalized Patient: EBSCOhost*. (n.d.). Retrieved July 28, 2021, from <http://web.b.ebscohost.com/ehost/pdfviewer/pdfviewer?vid=10&sid=a762f826-1ad0-4be7-b941-749b7955d836%40sessionmgr101>
- Park, H. S., Oh, D. H., Yoon, T., & Park, J. S. (2019). Effect of effortful swallowing training on tongue strength and oropharyngeal swallowing function in stroke patients with dysphagia: a double-blind, randomized controlled trial. *International Journal of Language and Communication Disorders, 54*(3), 479–484. <https://doi.org/10.1111/1460-6984.12453>
- Ploumis, A., Papadopoulou, S. L., Theodorou, S. J., Exarchakos, G., Givissis, P., & Beris, A. (2018). Cervical isometric exercises improve dysphagia and cervical spine malalignment following stroke with hemiparesis: A randomized controlled trial. *European Journal of Physical and Rehabilitation Medicine, 54*(6), 845–852. <https://doi.org/10.23736/S1973-9087.17.04952-8>

- Poorjavad, M., & Jalaie, S. (2014). Systemic review on highly qualified screening tests for swallowing disorders following stroke: Validity and reliability issues. *Journal of Research in Medical Sciences : The Official Journal of Isfahan University of Medical Sciences*, 19(8), 776. /pmc/articles/PMC4235100/
- Powers, W. J., Rabinstein, A. A., Ackerson, T., Adeoye, O. M., Bambakidis, N. C., Becker, K., Biller, J., Brown, M., Demaerschalk, B. M., Hoh, B., Jauch, E. C., Kidwell, C. S., Leslie-Mazwi, T. M., Ovbiagele, B., Scott, P. A., Sheth, K. N., Southerland, A. M., Summers, D. v., & Tirschwell, D. L. (2019). Guidelines for the early management of patients with acute ischemic stroke: 2019 update to the 2018 guidelines for the early management of acute ischemic stroke a guideline for healthcare professionals from the American Heart Association/American Stroke Association. In *Stroke* (Vol. 50, Issue 12, pp. E344–E418). Lippincott Williams and Wilkins. <https://doi.org/10.1161/STR.0000000000000211>
- Seedat, J., & Penn, C. (2016). Implementing oral care to reduce aspiration pneumonia amongst patients with dysphagia in a South African setting. *The South African Journal of Communication Disorders = Die Suid-Afrikaanse Tydskrif Vir Kommunikasieafwykings*, 63(1). <https://doi.org/10.4102/sajcd.v63i1.102>
- Simonelli, M., Ruoppolo, G., Iosa, M., Morone, G., Fusco, A., Grasso, M. G., Gallo, A., & Paolucci, S. (2019). A stimulus for eating. the use of neuromuscular transcutaneous electrical stimulation in patients affected by severe dysphagia after subacute stroke: A pilot randomized controlled trial. *NeuroRehabilitation*, 44(1), 103–110. <https://doi.org/10.3233/NRE-182526>
- Smith, E. E., Kent, D. M., Bulsara, K. R., Leung, L. Y., Lichtman, J. H., Reeves, M. J., Towfighi, A., Whiteley, W. N., & Zahuranec, D. B. (2018). Effect of Dysphagia Screening Strategies on Clinical Outcomes After Stroke: A Systematic Review for the 2018 Guidelines for the Early Management of Patients With Acute Ischemic Stroke. *Stroke*, 49(3), e123–e128. <https://doi.org/10.1161/STR.0000000000000159>
- Sørensen, R. T., Rasmussen, R. S., Overgaard, K., Lerche, A., Johansen, A. M., & Lindhardt, T. (2013). Dysphagia screening and intensified oral hygiene reduce pneumonia after stroke. *Journal of Neuroscience Nursing*, 45(3), 139–146. <https://doi.org/10.1097/JNN.0b013e31828a412c>
- Steele, C. M., Alsanei, W. A., Ayanikalath, S., Barbon, C. E. A., Chen, J., Cichero, J. A. Y., Coutts, K., Dantas, R. O., Duivesteyn, J., Giosa, L., Hanson, B., Lam, P., Lecko, C., Leigh, C., Nagy, A., Namasivayam, A. M., Nascimento, W. v., Odendaal, I., Smith, C. H., & Wang, H. (2015). The Influence of Food Texture and Liquid Consistency Modification on Swallowing

Physiology and Function: A Systematic Review. *Dysphagia*, 30(1), 2–26.

<https://doi.org/10.1007/s00455-014-9578-x>

- Stroke Foundation. (2019). *Clinical Guidelines for Stroke Management*. (n.d.). Retrieved July 28, 2021, from <https://informme.org.au/Guidelines/Clinical-Guidelines-for-Stroke-Management>
- Swan, K., Speyer, R., Heijnen, B. J., Wagg, B., & Cordier, R. (2015). Living with oropharyngeal dysphagia: effects of bolus modification on health-related quality of life—a systematic review. *Quality of Life Research*, 24(10), 2447–2456. <https://doi.org/10.1007/s11136-015-0990-y>
- Tarameshlu, M., Ansari, N. N., Ghelichi, L., & Jalaei, S. (2019). The effect of repetitive transcranial magnetic stimulation combined with traditional dysphagia therapy on poststroke dysphagia: A pilot double-blinded randomized-controlled trial. *International Journal of Rehabilitation Research*, 42(2), 133–138. <https://doi.org/10.1097/MRR.0000000000000336>
- Tian, Z. Y., Liao, X., Gao, Y., Liang, S. B., Zhang, C. Y., Xu, D. H., Liu, J. P., & Robinson, N. (2019). An overview of systematic reviews and meta-analyses on acupuncture for post-acute stroke dysphagia. In *Geriatrics (Switzerland)* (Vol. 4, Issue 4). MDPI Multidisciplinary Digital Publishing Institute. <https://doi.org/10.3390/geriatrics4040068>
- Ünlüer, N. Ö., Temuçin, Ç. M., Demir, N., Serel Arslan, S., & Karaduman, A. A. (2019). Effects of Low-Frequency Repetitive Transcranial Magnetic Stimulation on Swallowing Function and Quality of Life of Post-stroke Patients. *Dysphagia*, 34(3), 360–371. <https://doi.org/10.1007/s00455-018-09965-6>
- Vilardell, N., Rofes, L., Arreola, V., Speyer, R., & Clavé, P. (2015). A Comparative Study Between Modified Starch and Xanthan Gum Thickeners in Post-Stroke Oropharyngeal Dysphagia. *Dysphagia* 2015 31:2, 31(2), 169–179. <https://doi.org/10.1007/S00455-015-9672-8>
- Wagner, C., Marchina, S., Deveau, J. A., Frayne, C., Sulmonte, K., & Kumar, S. (2016). Risk of stroke-associated pneumonia and oral hygiene. *Cerebrovascular Diseases*, 41(1–2), 35–39. <https://doi.org/10.1159/000440733>
- Wang, Z.-Y., Chen, J.-M., & Ni, G.-X. (2019). Effect of an indwelling nasogastric tube on swallowing function in elderly post-stroke dysphagia patients with long-term nasal feeding. *BMC Neurology* 2019 19:1, 19(1), 1–7. <https://doi.org/10.1186/S12883-019-1314-6>
- Winstein, C. J., Stein, J., Arena, R., Bates, B., Cherney, L. R., Cramer, S. C., Deruyter, F., Eng, J. J., Fisher, B., Harvey, R. L., Lang, C. E., MacKay-Lyons, M., Ottenbacher, K. J., Pugh, S., Reeves, M. J., Richards, L. G., Stiers, W., & Zorowitz, R. D. (2016). Guidelines for Adult



Stroke Rehabilitation and Recovery: A Guideline for Healthcare Professionals from the American Heart Association/American Stroke Association. In *Stroke* (Vol. 47, Issue 6, pp. e98–e169). Lippincott Williams and Wilkins.

<https://doi.org/10.1161/STR.0000000000000098>

Wirth, R., Dziewas, R., Beck, A. M., Clavé, P., Hamdy, S., Heppner, H. J., Langmore, S., Leischker, A. H., Martino, R., Pluschinski, P., Rösler, A., Shaker, R., Warnecke, T., Sieber, C. C., & Volkert, D. (2016). Oropharyngeal dysphagia in older persons – from pathophysiology to adequate intervention: A review and summary of an international expert meeting.

*Clinical Interventions in Aging*, 11, 189–208. <https://doi.org/10.2147/CIA.S97481>

Wu, W., Fan, D., Zheng, C., Que, B., Lian, Q., Qiu, R., Chen, Y., Pan, L., & Zhang, Y. (2019).

Relieving throat and opening orifice acupuncture therapy for the post-stroke dysphagia.

*World Journal of Acupuncture - Moxibustion*, 29(1), 37–41.

<https://doi.org/10.1016/j.wjam.2019.04.004>
